# Supplementary material
Source: HighWire-hosted journal article supplement (https://tech.snmjournals.org/highwire/filestream/8619/field_highwire_adjunct_files/1/Color_Version_of_Figures.pdf)

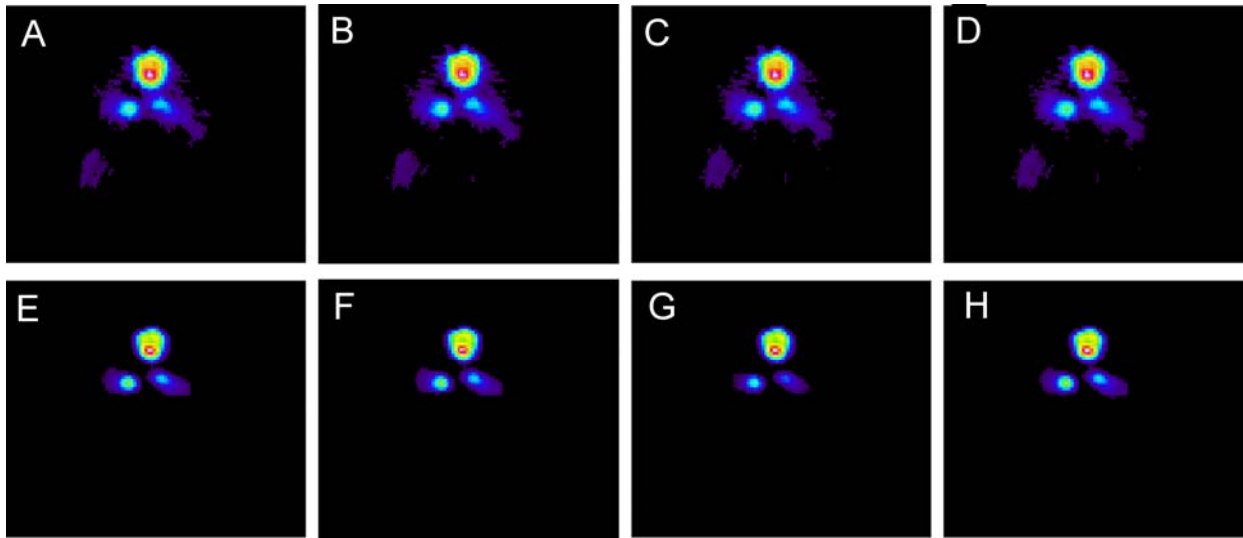

FIGURE 2.

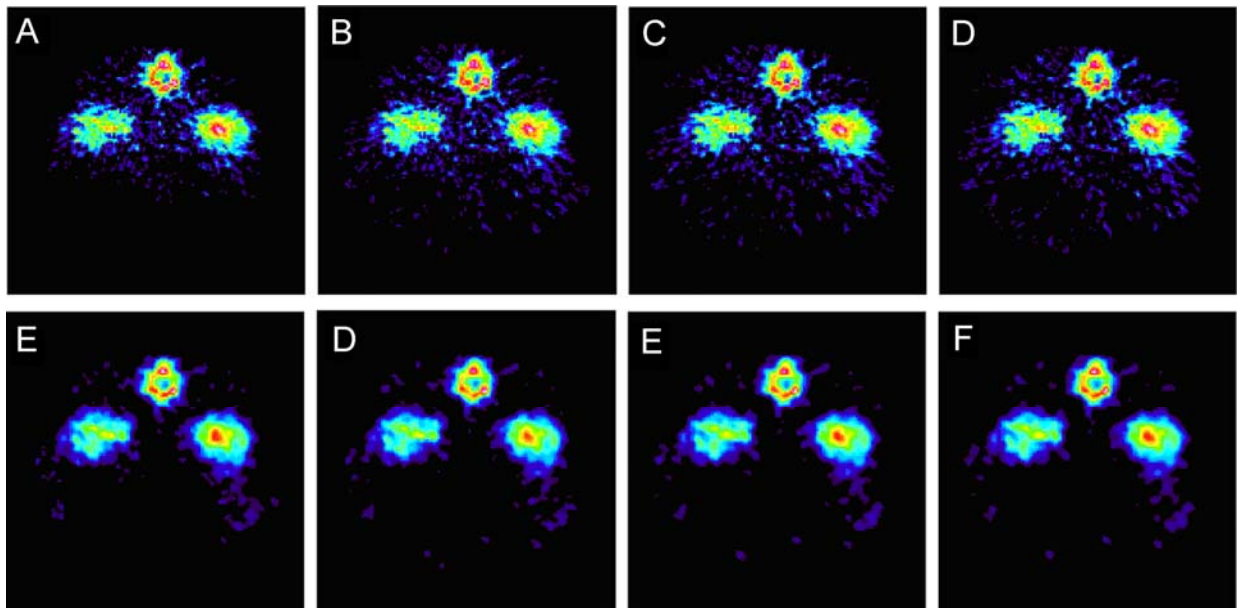

FIGURE 4.

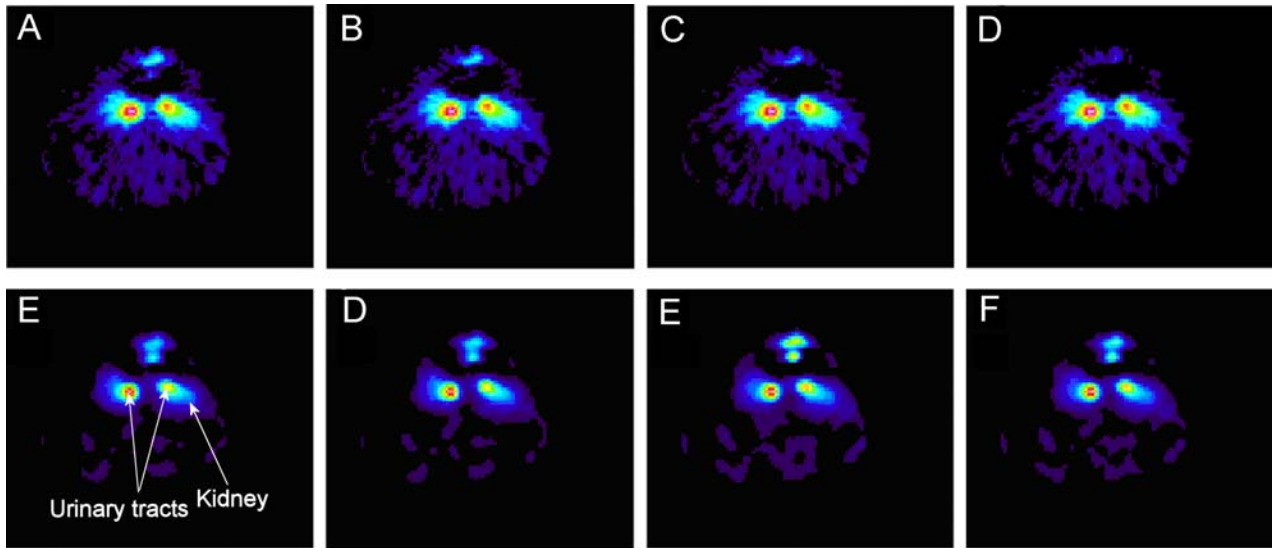

FIGURE 6.

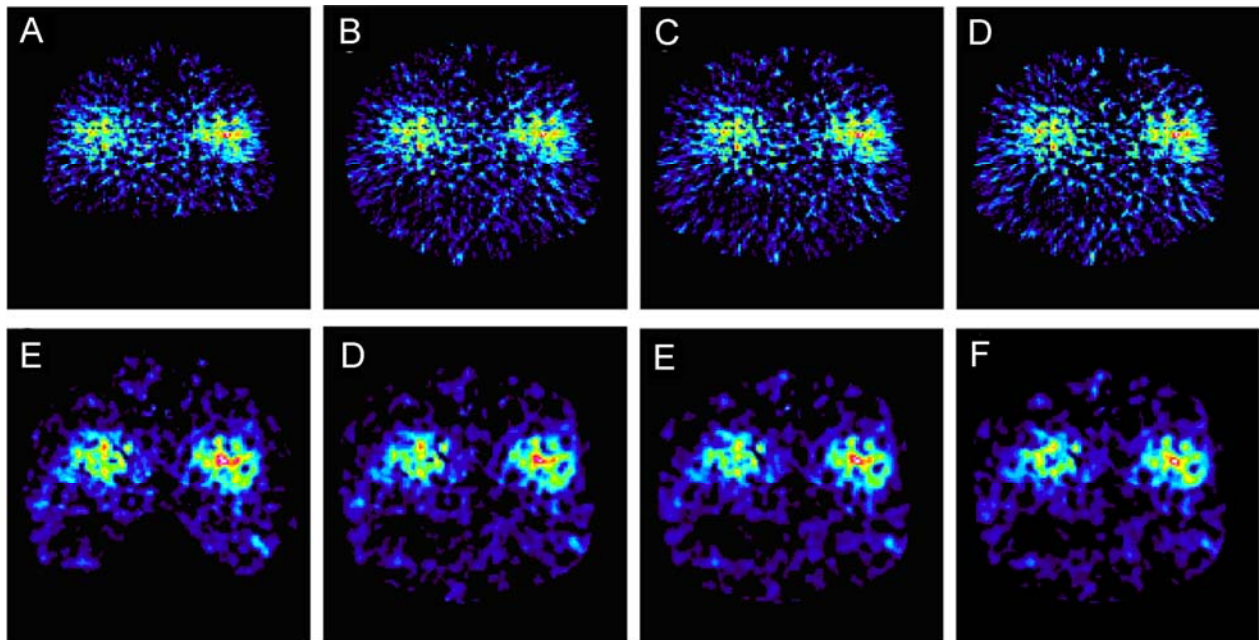

FIGURE 8.

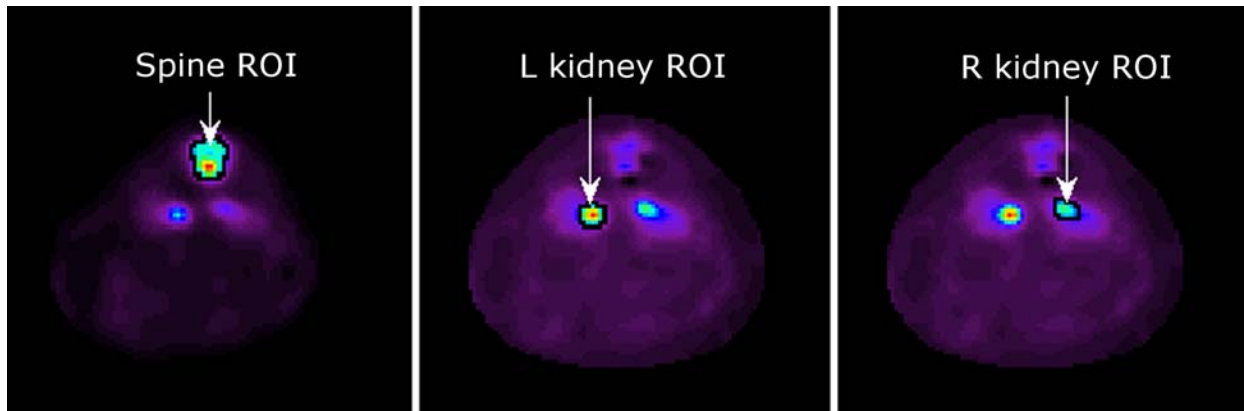

FIGURE 10.

Supplement: Color_Version_of_Figures.pdf [file Color_Version_of_Figures.pdf]
